# Supplementary material
Source: PubMed Central journal article supplement (PMC6235441)

## Web Extra Material

**eTable 1.** Microbiologic approach to enteric pathogen identification.

**eTable 2.** Pathogen yield of collection approaches – all specimens obtained included.

**eTable 3.** Pathogen yield ( $\geq 1$  positive pathogen) of collection approaches including only paired (stool and swab) specimens.

**eTable 4.** Agreement between collection approaches, paired samples (i.e. rectal swab and stool) only.

**eTable 5.** Individual pathogen level agreement between collection approaches, paired samples (i.e. rectal swab and stool) only.

**eTable 6.** Comparison of Ct values of specimen test results on ‘in-house’ gastroenteritis virus panel.

**eTable 7.** Comparison of Ct values of specimen test results on ‘in-house’ gastroenteritis virus panel comparing values between children with and without diarrhoea.

**eTable 8.** Rates of positive specimens and associated odds ratios in relation to specimen type with *C. difficile* positive specimens considered as negative in participants < 2 years of age.

**eTable 9.** Rates of positive specimens and associated odds ratios in relation to specimen type with analysis restricted to paired samples collected within 24 hours of each other.

**eFigure 1.** Correlation of real-time polymerase chain reaction cycle threshold (Ct) values from paired stool specimens and rectal swabs that were positive for a given pathogen with both specimens.

**eTable 1. Microbiologic approach to enteric pathogen identification.**

| <b>CULTURE Organism</b> | <b>Set up (agars specific to organisms)</b>                                                                                                                         | <b>Isolation Methodology</b>                                                                                                                                                                                              |
|-------------------------|---------------------------------------------------------------------------------------------------------------------------------------------------------------------|---------------------------------------------------------------------------------------------------------------------------------------------------------------------------------------------------------------------------|
| <i>Campylobacter</i>    | Stool/swab is planted to Campylobacter Blood Free Agar and incubated up to 72 hours at 42 +/-2C under microaerophilic conditions.                                   | Plates are read for typical growth, and a gram stain is performed for confirmation. Isolate is speciated by MALDI-TOF.                                                                                                    |
| <i>E. coli O157:H7</i>  | Stool/swab is planted to Colorex O157-T, a chromogenic agar containing 2.5mg/L potassium tellurite, and incubated at 35+/-2C for up to 24hrs.                       | Typical mauve colonies are screened for O157 serology and confirmed E. coli by API/Vitek 2                                                                                                                                |
| <i>Salmonella</i>       | Stool/swab is planted to MacConkey agar with Crystal Violet, Hektoen agar, as well as Shigella-Salmonella agar after 22-24hr enrichment in mannitol-selenite.       | Typical colonies are identified by API 20E/Maldi-TOF and serotyped using Check & Trace Salmonella molecular serotyping (Check-Points, Netherlands).                                                                       |
| <i>Shigella</i>         | Stool/swab is planted to MacConkey agar with Crystal Violet, Hektoen agar, as well as Shigella-Salmonella agar after 22-24hr enrichment in mannitol-selenite broth. | Typical colonies are identified by API 20E/Vitek 2 as Shigella and serogrouped. Groups B (flexneri) and D (sonnei) are serotyped at PL. Groups A (dysenteriae) and C (boydii) are referred to NML for further serotyping. |
| <i>Yersinia</i>         | Stool/swab is planted to Yersinia Agar (CIN) and incubated up to 24hrs at 35Deg C.                                                                                  | Typical colonies are identified by API20E/Maldi-Tof and speciated using biochemicals.                                                                                                                                     |
| <i>Aeromonas</i>        | Stool/swab is planted to Blood Agar Plate and incubated up to 24hrs at 35Deg C. Aeromonas can also be detected from the CIN plate.                                  | Typical alpha haemolytic colonies are confirmed with oxidase test, identified by API20E/Maldi-Tof and speciated using biochemical.                                                                                        |

**eTable 2. Pathogen yield of collection approaches – all specimens obtained included.**

|                                                 | Either Stool<br>or Swab Positive<br>N; (%) | Rectal Swab Positive<br>N; (%) | Stool Positive<br>N; (%) |
|-------------------------------------------------|--------------------------------------------|--------------------------------|--------------------------|
| <b>Any Test<sup>†</sup></b>                     |                                            |                                |                          |
|                                                 | N=1519                                     | N=1514                         | N=1147                   |
| <b>Any Pathogen</b>                             | <b>1121 (73·8)</b>                         | <b>1024 (67·6)</b>             | <b>871 (75·9)</b>        |
| <b>‘in-house’ Viral Panel (GEV)<sup>¶</sup></b> |                                            |                                |                          |
|                                                 | N=1518                                     | N=1512                         | N=1144                   |
| <b>Any GEV Target</b>                           | <b>1021 (67·3)</b>                         | <b>937 (62·0)</b>              | <b>799 (69·8)</b>        |
| Adenovirus                                      | 241 (15·9)                                 | 180 (11·9)                     | 195 (17·1)               |
| Astrovirus                                      | 40 (2·6)                                   | 34 (2·3)                       | 34 (3·0)                 |
| Norovirus                                       | 373 (24·6)                                 | 324 (21·4)                     | 289 (25·3)               |
| Rotavirus                                       | 395 (26·0)                                 | 376 (24·9)                     | 315 (27·5)               |
| Sapovirus                                       | 126 (8·3)                                  | 116 (7·7)                      | 96 (8·4)                 |
| <b>Luminex GPP<sup>§</sup></b>                  |                                            |                                |                          |
|                                                 | N=1518                                     | N=1512                         | N=1143                   |
| <b>Any GPP Viral Target</b>                     | <b>822 (54·2)</b>                          | <b>743 (49·1)</b>              | <b>649 (56·8)</b>        |
| Adenovirus 40/41                                | 107 (7·1)                                  | 97 (6·4)                       | 87 (7·6)                 |
| Norovirus GI/GII                                | 340 (22·4)                                 | 288 (19·1)                     | 264 (23·1)               |
| Rotavirus                                       | 395 (26·0)                                 | 371 (24·5)                     | 314 (27·5)               |
| <b>Any GPP Bacterial Target</b>                 | <b>230 (15·2)</b>                          | <b>190 (12·6)</b>              | <b>166 (14·5)</b>        |
| <i>Campylobacter</i>                            | 10 (0·7)                                   | 9 (0·6)                        | 5 (0·4)                  |
| <i>C. difficile tcdA/B</i>                      | 174 (11·5)                                 | 148 (9·8)                      | 121 (10·6)               |
| <i>E. coli</i> O157:H7                          | 7 (0·5)                                    | 6 (0·4)                        | 6 (0·5)                  |
| ETEC LT/ST                                      | 4 (0·3)                                    | 2 (0·13)                       | 3 (0·26)                 |
| <i>Salmonella</i>                               | 21 (1·4)                                   | 14 (0·9)                       | 17 (1·5)                 |
| <i>stx1/stx 2</i>                               | 19 (1·3)                                   | 13 (0·9)                       | 16 (1·4)                 |
| <i>Shigella</i>                                 | 5 (0·3)                                    | 5 (0·33)                       | 4 (0·35)                 |
| <i>Vibrio cholerae</i>                          | 0                                          | 0                              | 0                        |
| <i>Yersinia enterocolitica</i>                  | 1 (0·1)                                    | 0                              | 1 (0·09)                 |
| <b>Any GPP Parasite Target</b>                  | <b>7 (0·5)</b>                             | <b>1 (0·07)</b>                | <b>6 (0·5)</b>           |
| <i>Cryptosporidium</i>                          | 0                                          | 0                              | 0                        |
| <i>Entamoeba histolytica</i>                    | 3 (0·2)                                    | 0                              | 3 (0·3)                  |
| <i>Giardia</i>                                  | 4 (0·3)                                    | 1 (0·07)                       | 3 (0·3)                  |
| <b>Bacterial Culture<sup>*</sup></b>            |                                            |                                |                          |
|                                                 | N=1501                                     | N=1468                         | N=998                    |
| <b>Any Bacterial Culture Target</b>             | <b>50 (3·3)</b>                            | <b>43 (2·9)</b>                | <b>35 (3·5)</b>          |
| <i>Aeromonas</i> spp.                           | 16 (1·1)                                   | 9 (0·6)                        | 7 (0·7)                  |
| <i>Campylobacter</i> spp.                       | 9 (0·6)                                    | 7 (0·5)                        | 6 (0·6)                  |
| <i>E. coli</i> O157:H7                          | 3 (0·2)                                    | 3 (0·2)                        | 1 (0·1)                  |
| <i>Salmonella</i> spp.                          | 22 (1·5)                                   | 18 (1·2)                       | 14 (1·4)                 |
| <i>Shigella</i> spp.                            | 4 (0·3)                                    | 4 (0·27)                       | 3 (0·3)                  |
| <i>Yersinia</i> spp.                            | 4 (0·3)                                    | 2 (0·14)                       | 3 (0·3)                  |
| Other                                           | 1 (0·07)                                   | 0                              | 1 (0·1)                  |

† Dry rectal swabs were tested on ‘in-house’ gastroenteritis virus panel and Luminex GPP but were not tested on bacterial culture; rectal swab in gel were tested on bacterial culture but were not tested on ‘in-house’ gastroenteritis virus panel or Luminex GPP; stool specimens were tested on ‘in-house’ gastroenteritis virus panel, Luminex GPP and on bacterial culture. There were 1519 children had a rectal swab and/or a stool specimen tested of which 1512 children had a dry rectal swab tested, 1468 had a rectal swab in gel tested and 1147 had a stool specimen tested.

¶ 1512 children had dry rectal swabs obtained – all were tested on the ‘in-house’ gastroenteritis virus panel and Luminex GPP

§ 1468 children had rectal swab in gel obtained – all were tested on bacterial culture.

\* 1147 stool specimens were obtained; 3 stool specimens were unable to be tested employing the ‘in-house’ gastroenteritis virus panel. 4 stool specimens were unable to be tested employing the Luminex GPP. 149 stool specimens deemed not suitable for standard enteric bacterial culture (128 insufficient quantity, 15 laboratory linked record could not be identified, 5 requisition incomplete, 1 sample leakage).

eTable 3. Comparative yields in relation to specimen type at a pathogen level.

|                                             | Either Stool<br>or Swab Positive<br>N; (%) | Rectal Swab Positive<br>N; (%) | Stool Positive<br>N; (%) | *P Value            |
|---------------------------------------------|--------------------------------------------|--------------------------------|--------------------------|---------------------|
| <b>Any Test N=1142</b>                      |                                            |                                |                          |                     |
| <b>Any Enteropathogen N (%)</b>             | <b>885 (77.5)</b>                          | <b>793 (69.4)</b>              | <b>866 (75.8)</b>        | <b>&lt; 0.0001‡</b> |
| <b>'in-house' Viral Panel (GEV); N=1138</b> |                                            |                                |                          |                     |
| <b>Any GEV Target N (%)</b>                 | <b>803 (70.6)</b>                          | <b>725 (63.7)</b>              | <b>793 (69.7)</b>        | <b>&lt; 0.0001‡</b> |
| Adenovirus N (%)                            | 196 (17.2)                                 | 137 (12.0)                     | 193 (17.0)               | < 0.0001‡           |
| Astrovirus N (%)                            | 33 (2.9)                                   | 28 (2.5)                       | 33 (2.9)                 | 0.063               |
| Norovirus GI/GII N (%)                      | 288 (25.3)                                 | 241 (21.2)                     | 287 (25.2)               | < 0.0001‡           |
| Rotavirus N (%)                             | 319 (28.0)                                 | 302 (26.5)                     | 313 (27.5)               | 0.035               |
| Sapovirus N (%)                             | 99 (8.7)                                   | 89 (7.8)                       | 96 (8.4)                 | 0.092               |
| <b>Luminex GPP; N=1137</b>                  |                                            |                                |                          |                     |
| <b>Any GPP Viral Target N (%)</b>           | <b>653 (57.4)</b>                          | <b>580 (51.0)</b>              | <b>643 (56.6)</b>        | <b>&lt; 0.0001‡</b> |
| Adenovirus 40/41 N (%)                      | 85 (7.5)                                   | 77 (6.8)                       | 85 (7.5)                 | 0.0078              |
| Norovirus GI/GII N (%)                      | 264 (23.2)                                 | 214 (18.8)                     | 262 (23.0)               | < 0.0001‡           |
| Rotavirus N (%)                             | 320 (28.1)                                 | 298 (26.2)                     | 312 (27.4)               | 0.016               |
| <b>Any GPP Bacterial Target N (%)</b>       | <b>194 (17.1)</b>                          | <b>155 (13.6)</b>              | <b>165 (14.5)</b>        | <b>0.275</b>        |
| <i>Campylobacter</i> sp. N (%)              | 5 (0.4)                                    | 4 (0.4)                        | 5 (0.4)                  | >0.999              |
| <i>C. difficile</i> tcdA/B N (%)            | 147 (12.9)                                 | 122 (10.7)                     | 120 (10.6)               | 0.890               |
| <i>E. coli</i> O157:H7 N (%)                | 6 (0.5)                                    | 5 (0.4)                        | 6 (0.5)                  | >0.999              |
| ETEC LT/ST, N (%)                           | 3 (0.26)                                   | 1 (0.09)                       | 3 (0.26)                 | 0.500               |
| <i>Salmonella</i> sp. N (%)                 | 20 (1.8)                                   | 13 (1.1)                       | 17 (1.5)                 | 0.344               |
| <i>stx1/stx2</i> N (%)                      | 18 (1.6)                                   | 12 (1.1)                       | 16 (1.4)                 | 0.289               |
| <i>Shigella</i> sp. N (%)                   | 5 (0.4)                                    | 5 (0.4)                        | 4 (0.4)                  | >0.999              |
| <i>Vibrio cholerae</i> N (%)                | 0                                          | 0                              | 0                        | -                   |
| <i>Yersinia enterocolitica</i> N (%)        | 1 (0.09)                                   | 0                              | 1 (0.09)                 | -                   |
| <b>Any GPP Parasite Target N (%)</b>        | <b>6 (0.5)</b>                             | <b>0</b>                       | <b>6 (0.5)</b>           | <b>-</b>            |
| <i>Cryptosporidium</i> N (%)                | 0                                          | 0                              | 0                        | -                   |
| <i>Entamoeba histolytica</i> N (%)          | 3 (0.3)                                    | 0                              | 3 (0.3)                  | -                   |
| <i>Giardia</i> N (%)                        | 3 (0.3)                                    | 0                              | 3 (0.3)                  | -                   |
| <b>Bacterial Culture; N=965</b>             |                                            |                                |                          |                     |
| <b>Any Bacterial Culture Target N (%)</b>   | <b>43 (4.6)</b>                            | <b>27(2.8)</b>                 | <b>35 (3.6)</b>          | <b>0.152</b>        |
| <i>Aeromonas</i> spp. N (%)                 | 11 (1.1)                                   | 4 (0.4)                        | 7 (0.7)                  | 0.549               |
| <i>Campylobacter</i> spp. N (%)             | 6 (0.6)                                    | 4 (0.4)                        | 6 (0.6)                  | 0.500               |
| <i>E. coli</i> O157:H7 N (%)                | 1 (0.1)                                    | 1 (0.1)                        | 1 (0.1)                  | >0.999              |
| <i>E. coli</i> O26:H11 N (%)                | 1 (0.1)                                    | 0                              | 1 (0.1)                  | -                   |
| <i>Salmonella</i> spp. N (%)                | 16 (1.7)                                   | 12 (1.2)                       | 14 (1.5)                 | 0.687               |
| <i>Shigella</i> spp. N (%)                  | 4 (0.4)                                    | 4 (0.4)                        | 3 (0.3)                  | >0.999              |
| <i>Yersinia</i> spp. N (%)                  | 4 (0.4)                                    | 2 (0.2)                        | 3 (0.3)                  | >0.999              |

\*P value for McNemar test. P value for summary measures (any pathogen; any GEV target; any GPP viral target; any GPP bacterial target; any GPP parasite target; and any bacterial culture target) adjusted using Benjamini-Hochberg procedure (N=5) and significance was determined separately from those of the individual pathogen targets (N=27).

‡Indicates statistically significant after correction via to Benjamini-Hochberg procedure for multiple comparisons.

**eTable 4. Agreement between collection approaches, submitted paired samples (i.e. rectal swab and stool) only.**

| <b>Any Pathogen (N=1142)</b>                             |                                                    |                                         |
|----------------------------------------------------------|----------------------------------------------------|-----------------------------------------|
|                                                          | <b>Stool Positive <math>\geq</math> 1 Pathogen</b> | <b>Stool Negative for All Pathogens</b> |
| <b>Rectal Swab Positive <math>\geq</math> 1 pathogen</b> | 774                                                | 19                                      |
| <b>Rectal Swab Negative for All Pathogens</b>            | 92                                                 | 257                                     |
| <b>Observed Kappa, <math>\kappa</math> (95% CI)</b>      | 0.76 (0.71, 0.80)                                  |                                         |
| <b>Viruses (N=1138)</b>                                  |                                                    |                                         |
|                                                          | <b>Stool Positive <math>\geq</math> 1 Virus</b>    | <b>Stool Negative for Viruses</b>       |
| <b>Rectal Swab Positive <math>\geq</math> 1 Virus</b>    | 717                                                | 11                                      |
| <b>Rectal Swab Negative for All Viruses</b>              | 79                                                 | 331                                     |
| <b>Observed Kappa, <math>\kappa</math> (95% CI)</b>      | 0.82 (0.79, 0.86)                                  |                                         |
| <b>Bacteria (N=1142)</b>                                 |                                                    |                                         |
|                                                          | <b>Stool Positive <math>\geq</math> 1 Bacteria</b> | <b>Stool Negative for All Bacteria</b>  |
| <b>Rectal Swab Positive <math>\geq</math> 1 Bacteria</b> | 134                                                | 32                                      |
| <b>Rectal Swab Negative for All Bacteria</b>             | 45                                                 | 931                                     |
| <b>Observed Kappa, <math>\kappa</math> (95% CI)</b>      | 0.74 (0.68, 0.80)                                  |                                         |
| <b>Parasites (N=1137)</b>                                |                                                    |                                         |
|                                                          | <b>Stool Positive <math>\geq</math> 1 Parasite</b> | <b>Stool Negative for All Parasites</b> |
| <b>Rectal Swab Positive <math>\geq</math> 1 Parasite</b> | 0                                                  | 0                                       |
| <b>Rectal Swab Negative for All Parasites</b>            | 6                                                  | 1131                                    |
| <b>Observed Kappa, <math>\kappa</math> (95% CI)</b>      | -                                                  |                                         |

**eTable 5. Individual pathogen level agreement between collection approaches, submitted paired samples (i.e. rectal swab and stool) only.**

| <b>Viruses</b>                             |                       |                       |
|--------------------------------------------|-----------------------|-----------------------|
| <b>Astrovirus</b>                          | <b>Stool Positive</b> | <b>Stool Negative</b> |
| Rectal Swabs Positive                      | 28                    | 0                     |
| Rectal Swabs Negative                      | 5                     | 1105                  |
| Observed Kappa, $\kappa$ (95% CI)          | 0.92 (0.84, 0.99)     |                       |
| <b>Adenovirus</b>                          | <b>Stool Positive</b> | <b>Stool Negative</b> |
| Rectal Swabs Positive                      | 134                   | 3                     |
| Rectal Swabs Negative                      | 59                    | 942                   |
| Observed Kappa, $\kappa$ (95% CI)          | 0.78 (0.73, 0.83)     |                       |
| <b>Norovirus GI/GII</b>                    | <b>Stool Positive</b> | <b>Stool Negative</b> |
| Rectal Swabs Positive                      | 240                   | 2                     |
| Rectal Swabs Negative                      | 47                    | 849                   |
| Observed Kappa, $\kappa$ (95% CI)          | 0.88 (0.85, 0.91)     |                       |
| <b>Rotavirus</b>                           | <b>Stool Positive</b> | <b>Stool Negative</b> |
| Rectal Swabs Positive                      | 300                   | 6                     |
| Rectal Swabs Negative                      | 18                    | 814                   |
| Observed Kappa, $\kappa$ (95% CI)          | 0.95 (0.926, 0.968)   |                       |
| <b>Sapovirus</b>                           | <b>Stool Positive</b> | <b>Stool Negative</b> |
| Rectal Swabs Positive                      | 86                    | 3                     |
| Rectal Swabs Negative                      | 10                    | 1039                  |
| Observed Kappa, $\kappa$ (95% CI)          | 0.92 (0.88, 0.96)     |                       |
| <b>Bacteria</b>                            |                       |                       |
| <b><i>Clostridium difficile tcdA/B</i></b> | <b>Stool Positive</b> | <b>Stool Negative</b> |
| Rectal Swabs Positive                      | 95                    | 27                    |
| Rectal Swabs Negative                      | 25                    | 990                   |
| Observed Kappa, $\kappa$ (95% CI)          | 0.76 (0.70, 0.82)     |                       |

**eTable 6. Comparison of Ct values of specimen test results on ‘in-house’ gastroenteritis virus panel.**

|                      | Ct Values Concordant Positive |                    |                   |          | Ct Values Stool Positive Swab Negative |                    |          | Ct Values Swab Positive Stool Negative |                   |           |
|----------------------|-------------------------------|--------------------|-------------------|----------|----------------------------------------|--------------------|----------|----------------------------------------|-------------------|-----------|
|                      | N                             | Stool Median (IQR) | Swab Median (IQR) | P Value* | N                                      | Stool Median (IQR) | P Value‡ | N                                      | Swab Median (IQR) | P Value‡‡ |
| <b>Astrovirus</b>    | 28                            | 19 (18, 24)        | 23 (20, 28)       | <0.0001  | 5                                      | 31 (19, 33)        | 0.088    | 0                                      | -                 | -         |
| <b>Adenovirus</b>    | 134                           | 17 (13, 25)        | 23 (19, 30)       | <0.0001  | 59                                     | 34 (31, 36)        | < 0.0001 | 3                                      | 36 (36,37)        | 0.0019    |
| <b>Norovirus GI</b>  | 10                            | 22 (19, 26)        | 25 (20, 30)       | 0.022    | 2                                      | 19 (16, 22)        | 0.606    | 0                                      | -                 | -         |
| <b>Norovirus GII</b> | 231                           | 17 (15, 21)        | 22 (19, 27)       | <0.0001  | 45                                     | 22 (16, 32)        | 0.00049  | 1                                      | 30-0              | 0.284     |
| <b>Rotavirus</b>     | 296                           | 18 (16, 22)        | 20 (18, 24)       | <0.0001  | 17                                     | 22 (17, 27)        | 0.059    | 6                                      | 29 (20, 32)       | 0.031     |
| <b>Sapovirus</b>     | 86                            | 18 (16, 25)        | 25 (21, 30)       | <0.0001  | 10                                     | 34 (22, 35)        | 0.0021   | 3                                      | 36 (21, 38)       | 0.177     |

\* P value reflects comparison of paired positive stool and swab specimens, evaluated using Wilcoxon Signed Rank Test.

‡ P value reflects comparison to stool Ct value of concordant positive specimens, evaluated using Mann-Whitney U Test (un-paired specimens).

‡‡ P value reflects comparison to swab Ct value of concordant positive specimens, evaluated using Mann-Whitney U Test (un-paired specimens).

**eTable 7. Comparison of Ct values of specimen test results on ‘in-house’ gastroenteritis virus panel comparing values between children with and without diarrhoea.**

|                      | Stool Ct value<br>Median (IQR) |                      |     |                      |          | Rectal Swabs Ct value<br>Median (IQR) |                      |     |                      |          |
|----------------------|--------------------------------|----------------------|-----|----------------------|----------|---------------------------------------|----------------------|-----|----------------------|----------|
|                      | N                              | Diarrhea present     | N   | Diarrhea absent      | P Value‡ | N                                     | Diarrhea present     | N   | Diarrhea absent      | P Value‡ |
| <b>Astrovirus</b>    | 28                             | 19.40 (17.93, 23.95) | 5   | 25.90 (18.87, 32.55) | 0.157    | 30                                    | 22.00 (19.88, 25.38) | 3   | 34.50 (28.01, -)     | 0.0040   |
| <b>Adenovirus</b>    | 153                            | 23.30 (13.80, 32.80) | 42  | 23.30 (16.33, 32.78) | 0.589    | 137                                   | 23.00 (18.95, 28.95) | 43  | 26.18 (19.30, 32.40) | 0.209    |
| <b>Norovirus GI</b>  | 6                              | 22.40 (18.66, 26.38) | 5   | 22.10 (15.35, 28.17) | 0.662    | 7                                     | 26.10 (22.43, 29.37) | 3   | 20.70 (17.10, -)     | 0.667    |
| <b>Norovirus GII</b> | 175                            | 17.70 (15.80, 22.10) | 102 | 17.25 (14.50, 21.68) | 0.181    | 202                                   | 23.25 (19.76, 27.60) | 111 | 23.40 (18.90, 27.83) | 0.751    |
| <b>Rotavirus</b>     | 336                            | 19.40 (17.93, 23.95) | 39  | 20.90 (17.10, 24.50) | 0.0099   | 275                                   | 20.22 (17.70, 23.50) | 40  | 21.66 (19.99, 25.83) | 0.0043   |
| <b>Sapovirus</b>     | 71                             | 18.90 (16.50, 27.70) | 25  | 18.10 (14.45, 22.30) | 0.227    | 78                                    | 25.39 (21.72, 29.95) | 38  | 24.55 (19.10, 30.82) | 0.476    |

‡ P Mann-Whitney U Test (un-paired specimens).



**eTable 8. Comparative and overall yields in relation to specimen type, with *C. difficile* positive specimens considered as negative in participants < 2 years of age.**

|                                                                                                                               | No. (%)            |                    | Odds Ratios (95% CI)‡                                                            |
|-------------------------------------------------------------------------------------------------------------------------------|--------------------|--------------------|----------------------------------------------------------------------------------|
|                                                                                                                               | Rectal Swab        | Stool              |                                                                                  |
| <b>Comparative Yield - Unadjusted<br/>≥ 1 Pathogen</b>                                                                        | 1142<br>770 (67.4) | 1142<br>841(73.6)  | 1.35 (1.24, 1.47)                                                                |
| <b>Adjusted for Interaction<br/>with Diarrhea<br/>without Diarrhea</b>                                                        |                    |                    | 1.23 (1.11, 1.36)<br>1.71 (1.43, 2.04)                                           |
| <b>Overall Yield - Unadjusted<br/>≥ 1 Pathogen</b>                                                                            | 1519<br>991 (65.2) | 1519<br>846 (55.7) | 0.67 (0.61, 0.74)                                                                |
| <b>Adjusted for Interaction<br/>ED with Diarrhea<br/>ED without Diarrhea<br/>Home with Diarrhea<br/>Home without Diarrhea</b> |                    |                    | 0.52 (0.45, 0.60)<br>0.73 (0.60, 0.88)<br>0.94 (0.77, 1.15)<br>1.32 (1.01, 1.72) |

‡ORs represent stool relative to rectal swab.

**eTable 9. Comparative yield in relation to specimen type with analysis restricted to paired samples collected within 24 hours of each other.**

|                                                | No. (%)           |                   | Odds Ratios (95% CI)‡ |
|------------------------------------------------|-------------------|-------------------|-----------------------|
|                                                | Rectal Swab       | Stool             |                       |
| Comparative Yield - Unadjusted<br>≥ 1 Pathogen | 883<br>634 (71.8) | 883<br>686 (77.7) | 1.37 (1.24, 1.51)     |
| Adjusted for Interaction                       |                   |                   |                       |
| with Diarrhoea                                 |                   |                   | 1.25 (1.11, 1.40)     |
| without Diarrhoea                              |                   |                   | 1.75 (1.40, 2.17)     |

‡ORs represent stool relative to rectal swab.

**eFigure 1. Correlation of real-time polymerase chain reaction cycle threshold (Ct) values from paired stool specimens and rectal swabs that were positive for a given pathogen with both specimens.**

Figures A – E reflect Real-time polymerase chain reaction Ct values that can be used as a semi-quantitative measure of the amount of nucleic acid of the detected target present in each sample. The value is inversely proportional to the amount of viral nucleic acid in the specimen; lower Ct values correlate with larger amounts of deoxyribonucleic acid/ribonucleic acid of the target.

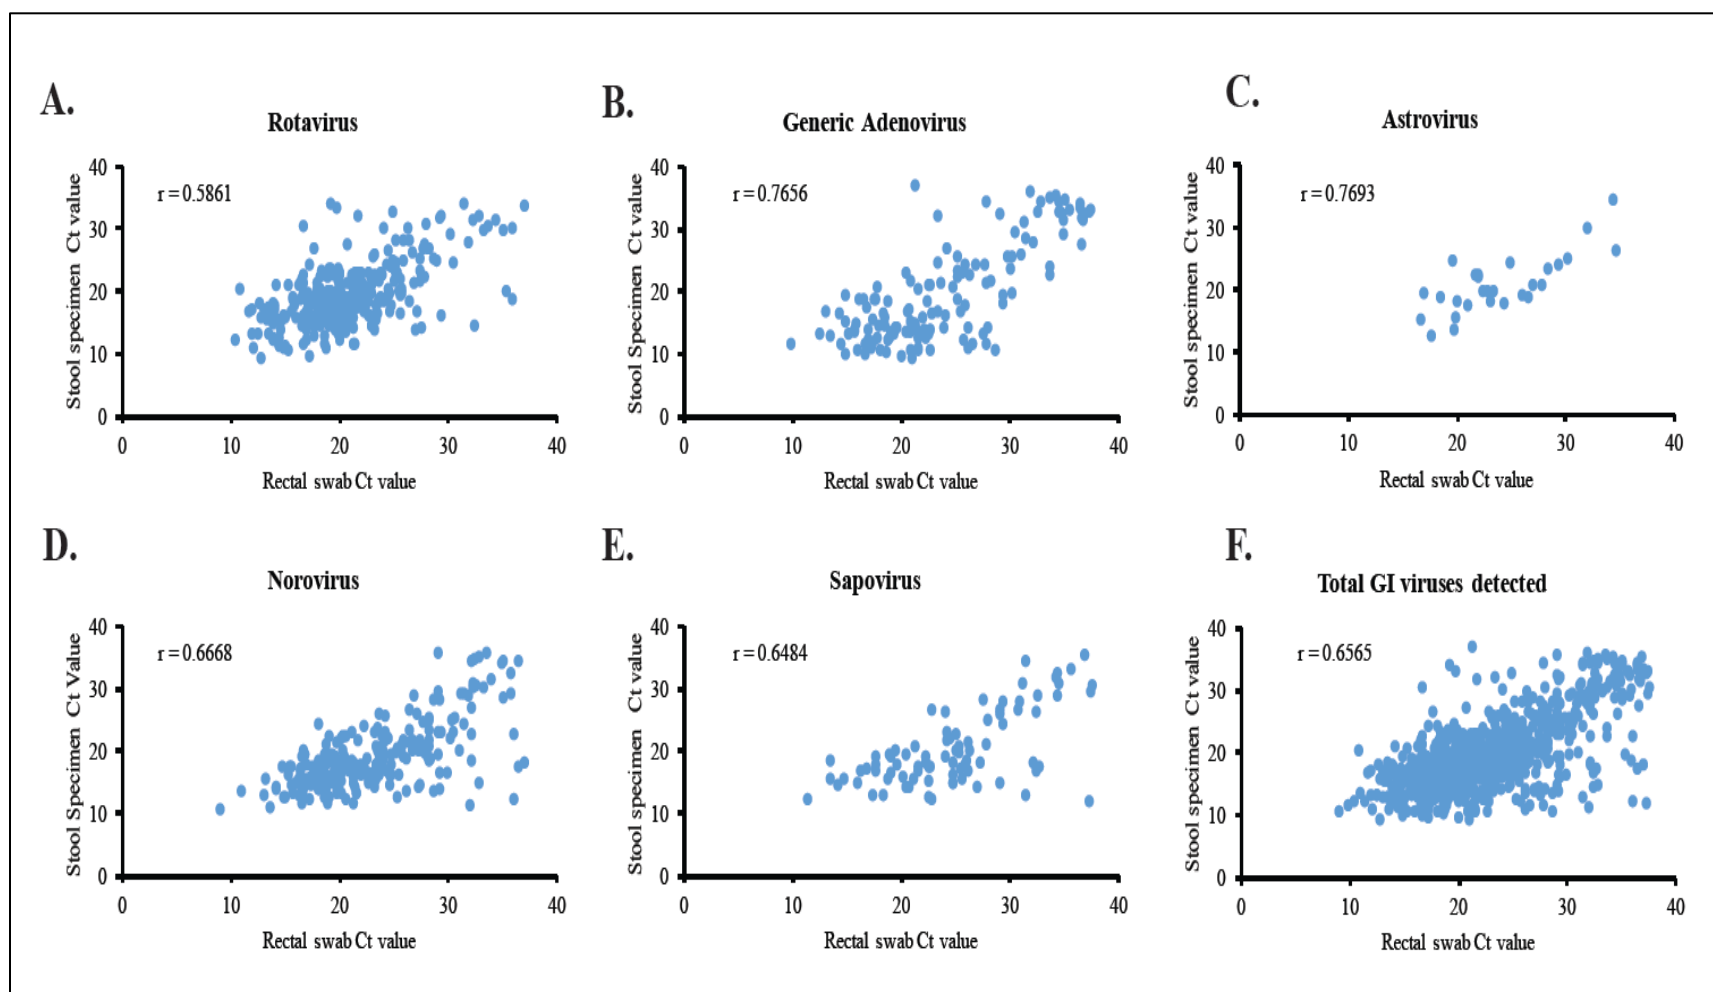

Supplement: NIHMS906299-supplement-Supp_Appendix.pdf [file NIHMS906299-supplement-Supp_Appendix.pdf]
